# Supplementary material for: Synthesis, structure, spectroscopy and redox chemistry of square-planar nickel(ii) complexes with tetradentate o-phenylenedioxamidates and related ligands
Source: Royal Society of Chemistry journal article supplement (doi:10.1039/b502478a), 2005-01-01
Supplement: b502478a.pdf [file b502478a.pdf]

# Supplementary information

for the manuscript

**Synthesis, structure, spectroscopy and redox chemistry of  
square-planar nickel(II) complexes with tetradentate  
*o*-phenylenedioxamidates and related ligands**

Xavier Ottenwaelder, Ally Aukauloo, Yves Journaux,\* Rosa Carrasco, Joan Cano,  
Beatriz Cervera, Isabel Castro, S. Curreli, M. Carmen Muñoz, Antonio L. Roselló,  
Bernardino Soto and Rafael Ruiz-García\*

**Table S1** Proton NMR spectroscopic data for **4–6**<sup>a,b</sup>

| Complex  | NMe          | <i>m</i> -H              | <i>o</i> -H              |
|----------|--------------|--------------------------|--------------------------|
| <b>4</b> | 2.51 (6H, s) | 6.56 (2H, dd) (5.9, 3.5) | 8.03 (2H, dd) (6.0, 3.5) |
| <b>5</b> | 2.50 (3H, s) | 6.61 (2H, dd) (5.9, 3.5) | 7.91 (2H, dd) (6.0, 3.5) |
| <b>6</b> |              | 6.65 (2H, dd) (5.8, 3.4) | 7.90 (2H, dd) (6.0, 3.5) |

<sup>a</sup>  $\delta$  (ppm) values in acetonitrile.  $J$  (Hz) values are given in parentheses. <sup>b</sup> Other signals from Me<sub>4</sub>N<sup>+</sup> counterions at 3.10 (24 H, s).

**Table S2** Electronic absorption spectroscopic data for **4–6**<sup>a</sup>

---

| Complex  | $\lambda_{\text{max}}/\text{nm}$ ( $\epsilon/\text{M}^{-1} \text{cm}^{-1}$ ) |
|----------|------------------------------------------------------------------------------|
| <b>4</b> | 256 (23000), 317 (sh), 357 (6500), 410 (sh)                                  |
| <b>5</b> | 254 (23000), 309 (sh), 352 (5500), 380 (sh), 410 (sh)                        |
| <b>6</b> | 250 (23000), 274 (sh), 350 (7200), 465 (240)                                 |

---

<sup>a</sup> In acetonitrile.

**Table S3** X-Ray absorption spectroscopic data for **4** and nickel(II) sulfate aqueous solution<sup>a,b</sup>

---

| Complex                                            | Preedge            | Edge                                                             |
|----------------------------------------------------|--------------------|------------------------------------------------------------------|
| <b>4</b>                                           | 8331.6 (0.04) (sh) | 8339.2 (0.4) (sh), 8346.4 (0.7) (sh), 8351.5 (1.3), 8352.7 (1.3) |
| [Ni(H <sub>2</sub> O) <sub>6</sub> ] <sup>2+</sup> | 8331.5 (0.03)      | 8348.6 (1.3)                                                     |

---

<sup>a</sup> *E* (eV) values. Normalized absorbance values (relative to the atomic absorption) are given in parentheses. <sup>b</sup> Structure-contributing peaks on and above the broad absorption band of the rising edge have been precisely located from the absorption spectrum and its second derivative.

---

**Table S4** X-Ray absorption structural data for **4**<sup>a</sup>

|                    | $N^b$ | $R^c/\text{\AA}$ | $\sigma^d/\text{\AA}$ | $\Gamma^e$ | $E_0^f/\text{eV}$ |
|--------------------|-------|------------------|-----------------------|------------|-------------------|
| Ni–N(arylamidate)  | 2.0   | 1.85(2)          | 0.03                  | 1.7        | 8331.0            |
| Ni–N(alkylamidate) | 2.0   | 1.93(2)          | 0.04                  | 1.7        | 8331.0            |

<sup>a</sup> The fit was done using the theoretical amplitudes and phases of McKale (A. G. McKale, B. W. Veal and A. P. Paulikas, *J. Am. Chem. Soc.*, 1988, **110**, 3763). The residual factor defined as  $\Sigma(k\chi_{\text{exp}} - k\chi_{\text{th}})^2 / \Sigma\chi_{\text{exp}}^2$  was  $8.7 \times 10^{-3}$ . <sup>b</sup> The number of neighboring atoms  $N$  was allowed to vary during the fitting procedure. <sup>c</sup>  $R$  is the distance from the nickel absorber. Estimated errors are given in parentheses. <sup>d</sup>  $\sigma$  is the Debye-Waller coefficient. <sup>e</sup> The mean-electron-free path  $\lambda$  was chosen as  $\lambda(k) = (1/\Gamma)[(\eta/k)^4 + k]$  with  $\eta = 3.1$ , and  $\Gamma$  was allowed to vary during the fitting procedure. <sup>f</sup>  $E_0$  is the ionization energy.

**Table S5** X-band EPR spectroscopic data for the singly oxidized species of **7–9**<sup>a,b</sup>

| Complex                          | $g_x$                         | $g_y$                         | $g_z$                         |
|----------------------------------|-------------------------------|-------------------------------|-------------------------------|
| [NiL <sup>1</sup> ] <sup>-</sup> | 2.006<br>(2.006) <sup>c</sup> | 2.080<br>(2.081) <sup>c</sup> | 2.193<br>(2.192) <sup>c</sup> |
| [NiL <sup>2</sup> ] <sup>-</sup> | 2.290                         | 2.290                         | 2.000                         |
| [NiL <sup>3</sup> ] <sup>-</sup> | 2.265                         | 2.265                         | 2.003                         |

<sup>a</sup> Best fit  $g$  values corresponding to the  $x$ ,  $y$  and  $z$  components of the allowed  $M_s = +1/2 \rightarrow M_s = -1/2$  transition. <sup>b</sup> In acetonitrile at 110 K. <sup>c</sup> In dichloromethane at 110 K.
